1 **Faecal metabarcoding reveals pervasive long-distance impacts of garden bird feeding**

2

3 Jack D Shutt <sup>1,2,\*</sup>, Urmi H Trivedi <sup>3</sup>, James A Nicholls <sup>2,4</sup>

4

5 1. Department of Natural Sciences, Manchester Metropolitan University, Manchester, M1 5GD, UK

6 2. Institute of Evolutionary Biology, The King's Buildings, University of Edinburgh, Edinburgh, EH9

7 3FL, UK

8 3. Edinburgh Genomics, University of Edinburgh, Edinburgh, EH9 3FL, UK

9 4. Australian National Insect Collection, CSIRO, Acton, ACT, 2601, Australia

10

11 \* Corresponding author: [jackshutt8@gmail.com](mailto:jackshutt8@gmail.com)

12

13 **Keywords:** blue tit, human impact, peanut, diet, phenology, population, supplementary provisioning

14 **Abstract**

15

16 Supplementary feeding of wildlife is widespread, being undertaken by more than half of households  
17 in many countries. However, the impact that these additional artificial resources have is unclear, and  
18 impacts are assumed to be restricted to urban ecosystems. Using faecal metabarcoding of blue tit  
19 (*Cyanistes caeruleus*) faeces collected in early spring from a 220km transect in Scotland with a large  
20 urbanisation gradient we reveal the pervasiveness of supplementary foodstuffs in the diet of a wild  
21 bird, being present in the majority of samples, with peanut (*Arachis hypogaea*) the single  
22 commonest (either natural or artificial) dietary item. Consumption rates exhibited a distance decay  
23 but remained high at several hundred metres from the nearest household and continued to our  
24 study limit of 1.4km distant. Supplementary food consumption was associated with a near  
25 quadrupling of blue tit breeding density and five days earlier breeding phenology. We show  
26 woodland bird species using supplementary food to have increasing UK population trends on  
27 average, while species that don't, and/or are outcompeted by blue tits, are likely to be declining. We  
28 suggest that supplementary feeding impacts are larger and extend further than previously  
29 appreciated and could be disrupting ecosystem dynamics and contributing to population-level  
30 effects.

31

32 **Introduction**

33

34 Supplementary feeding of garden wildlife is the most common active form of human-wildlife  
35 interaction and occurs globally [1,2]. It is particularly widespread in the Western world, with over  
36 half of all households participating in many Northern European and North American countries,  
37 providing an ever-increasing variety of foodstuffs and feeder designs targeting more diverse species  
38 each year [3,4]. Many mammal and insect species are intentionally provided with supplementary  
39 food, but bird feeding is the commonest activity [2,5]. In the UK, for example, the wild birdfood

40 market is estimated to be worth £241 million and supply around 150,000 tonnes of supplementary  
41 food annually [6] while in the USA over 500,000 tonnes are supplied annually [2,7]. In the UK there is  
42 estimated to be one supplementary bird feeder per 9 feeder-using birds [5], providing enough  
43 resources nationally to feed three times the entire breeding populations of the ten commonest  
44 feeder-using species year-round if they consumed nothing else [8]. Many mammal species such as  
45 squirrels and rats also use these resources incidentally but at high frequencies [2,9,10]. While garden  
46 wildlife feeding is actively encouraged by conservation organisations and official policy in a majority  
47 of countries, including the UK and USA [11,12], such an enormous resource addition is likely to have  
48 profound effects on both the organisms benefitting from it and their natural competitors and prey,  
49 and these effects are far from well understood [1,13,14].

50

51 Research into the direct effects of supplementary garden wildlife feeding on the species utilising it to  
52 date has developed a rather contradictory and mixed evidence base. While some studies have found  
53 that supplementary feeding advances breeding phenology and improves reproductive success due to  
54 increased resources [15–17], others have found the opposite, possibly due to poor nutrition [18,19].  
55 Similarly, some studies have found benefits to individual user health [20] while others have found  
56 detrimental effects [21]. Group health is also at risk as promoting artificial long-term aggregations of  
57 novel individual and species interactions has facilitated disease spread and crossover, causing large  
58 declines in some susceptible species [22,23]. There is consensus as to overwinter survival benefits,  
59 to such an extent that migration patterns can be altered due to novel year-round resources [24,25].  
60 Such a large-scale change in diet and feeding behaviour is also likely to have further effects that are  
61 just being realised, such as changes to blood chemistry [26] and evolutionary traits [27]. Elucidating  
62 any effects on the breeding ecology of feeder-using species is particularly important due to the  
63 immediate fitness and population impacts.

64

65 One reason why the evidence to date is conflicting may lie in many studies not being able to account  
66 for supplementary food uptake rates in their study organisms due to difficulties in diet detection,  
67 and without this critical information it is impossible to assess large-scale impacts and background  
68 consumption rates [1,13]. The advent of faecal metabarcoding provides a mechanism whereby this  
69 can be overcome [28]. This method detects fragments of prey DNA contained within faeces non-  
70 invasively, and while the technique is in its infancy and primarily applied to insect prey DNA [29,30],  
71 many food types can be distinguished, including plant DNA [31] which are traditionally the  
72 commonest supplementary foods provisioned for garden wildlife [1].

73

74 Most studies to date have provided additional experimental supplementary food and assumed a  
75 distance decay in uptake [18,19], however this has two major caveats. Firstly, it does not account for  
76 background supplementary feeding rates from resources provided by the local human population  
77 unconnected to the study itself, with such cross-contamination rates probably high due to the  
78 ubiquity of supplementary provisioning [1,5]. Secondly, the distance decay is unknown in most  
79 species and therefore supplementary feeding may be occurring over a wider scale than imagined  
80 [17,32]. Assessing diet composition directly through faecal metabarcoding without providing  
81 additional experimental resources overcomes these caveats.

82

83 The largely unknown distance over which the effects of supplementary feeding occur is also  
84 evidenced by the literature focus that impacts are only, or overwhelmingly, encountered in the  
85 urban environment, even altering community structure there [33–35]. This ignores that many  
86 provisioned bird, mammal and insect species are able to move long distances in search of reliable  
87 feeding opportunities [32], and that rural human dwellings are likely to provide more supplementary  
88 food per household than urban dwellings [4]. Additionally, research to date has focussed solely on  
89 the species that utilise supplementary feeding without considering those that do not. It is likely that  
90 increases in populations of supplementary food-using species [33] and individual competitiveness

91 will have a negative effect on their competitor and prey species that do not benefit from  
92 supplementary feeding, as background habitat availability is unchanged. Furthermore, if the effects  
93 of supplementary feeding are felt over a wider area than solely urban environments, the impacts on  
94 community composition and conservation could be far-reaching [16]. Therefore, it is crucial to  
95 understand over what distances feeder-using species are travelling to make use of supplementary  
96 food resources and what impact this is having upon their ecology, fitness and populations.

97

98 In this study, we analyse data from a widespread and common avian supplementary food user, the  
99 blue tit (*Cyanistes caeruleus*), across a 220km transect of Scotland [36] with a large gradient in  
100 distance to human habitation and therefore supplementary feeding. We use faecal metabarcoding  
101 to uncover what proportion of faeces contain supplementary garden bird food immediately prior to  
102 breeding and over what distance supplementary food use is occurring, predicting that use will  
103 decline with increasing distance. We then use site average supplementary food use to determine  
104 effects on breeding ecology. Finally, we assess whether the utilisation of supplementary food is  
105 affecting recent population trends in blue tits and their competitors (insectivorous forest bird  
106 species) across the UK, hypothesising that if supplementary feeding is supporting higher populations  
107 of those species using it, these inflated populations may be having detrimental effects on the  
108 populations of competitor species that do not, contributing to human-mediated homogenising  
109 impacts on biodiversity [37,38]. We believe that this focal study system is highly representative of  
110 many supplementary feeding systems and that insights garnered should extrapolate across many  
111 systems.

112

## 113 **Methods**

114

### 115 **Field data collection**

116

117 Field data were collected from a transect of 39 predominantly deciduous woodlands during the  
118 springs of 2014-2016 [36]. At each site there were six Schwegler 1B 26 mm hole nestboxes  
119 distributed at approximately 40 m intervals. From mid-March in 2014 and 2015 the base of each  
120 nestbox was lined with greaseproof paper which was replaced when damaged or heavily soiled and  
121 removed at the onset of nest building or once a bird had attempted removal by pulling it through  
122 the hole [29]. Each nestbox was visited on alternate days and all faeces on the greaseproof paper  
123 were removed with sterilised tweezers (after use they were wiped with laboratory tissue and  
124 flamed), with up to a maximum of three faeces collected in a 2 ml Eppendorf tube containing pure  
125 ethanol, and the number of faeces collected recorded (with the exception of samples in early 2014).  
126 Faecal samples were stored at  $-18^{\circ}\text{C}$  within a day of collection and transferred to a  $-20^{\circ}\text{C}$  freezer at  
127 the end of each field season. Samples were collected from 19 March in 2014 and 18 March in 2015  
128 until nest building, giving a median sampling range of 20 days per site in 2014 and 24 days in 2015,  
129 and a maximum sampling range at a site of 34 days. Faecal samples were not collected in 2016.

130

131 The date of first egg laying was recorded for each nestbox (taken as the previous day if two eggs  
132 found, as blue tits lay one egg daily [39]) and nestboxes were designated as occupied in a particular  
133 year if at least one egg was laid in a nest by a blue tit. Clutch size was counted once all eggs were laid  
134 and incubation had begun. All nestlings were fitted with a metal identification ring under license and  
135 productivity was defined as the number of nestlings successfully fledged (number of nestlings alive  
136 at day 12 – number of dead nestlings found in nestbox subsequently). Parent birds of both sexes  
137 were also captured and fitted with metal identification rings under license and their mass, sex and  
138 age (first year breeder or second year plus) recorded. Latitude (site range  $55.98 - 57.88^{\circ}\text{N}$ ) and  
139 elevation (10 - 433 m) were obtained for each nestbox [36] and the Euclidian distance to nearest  
140 human habitation (33 – 1384m) was calculated for each nestbox after finding the coordinates of the  
141 nearest human dwelling via Google maps [40]. Due to the high incidence of supplementary bird  
142 feeding in the UK [2,4] this should be a good predictor of feeder availability.

143

144 **Molecular protocol and bioinformatics**

145

146 A total of 959 faecal samples were collected and 793 fully processed, with these selected by  
147 balancing subsampling across nestboxes and dates and an upper limit of ten samples per nestbox  
148 per year enforced [29]. If multiple faeces were present in the sample tube, part of each was used for  
149 DNA extraction. Thirty samples were processed in duplicate by dividing the faecal sample into two to  
150 assess repeatability. Twenty-four controls were also included (six extraction negatives, nine PCR  
151 negatives and nine PCR positives using *Inga pezizifera* as a non-native plant PCR positive).

152

153 DNA extraction was performed using the QIAamp DNA Stool Mini kit, following the protocol for  
154 pathogen detection with a few customisations to improve yields [29]. PCR amplification was  
155 targeted on three loci (of importance to this manuscript including the standard plant barcoding gene  
156 *rbcl*, also COI and 16S) and amplified a 'minibarcodes' of 184-220 base pairs. The second stage of PCR  
157 added indexed Illumina adaptors to the amplicons from each sample with amplicons multiplexed in  
158 three pools; each pool was then sequenced on an Illumina MiSeq using 150 base pair paired-end  
159 reads.

160

161 Sequencing reads were demultiplexed and processed as per the bioinformatics protocol detailed in  
162 Shutt *et al* 2020. Output sequences were clustered into molecular operational taxonomic units  
163 (MOTUs) and the taxonomic identity of MOTUs determined using a BLAST search of the reference  
164 set of MOTUs against GenBank and BOLD public databases.

165

166 Samples were tested for the presence of blue tit at the 16S locus and those with fewer than 100  
167 reads of blue tit were excluded from further analyses (n=9) following [29]. No non-blue tit avian DNA  
168 was found in any sample. All nine PCR positive control samples contained MOTUs attributable to

169 *Inga pezizifera* (range of reads = 4,007 – 12,697) and no more than 19 reads of another MOTU. All  
170 nine PCR negative control samples and three of the six extraction negative control samples  
171 contained no more than 22 reads of any MOTU. The remaining three extraction negative control  
172 samples showed high numbers of reads (n = 991 – 6,302) from contaminating tomato but nothing  
173 else. Systematic contamination at the *rbcl* locus was investigated by assessing row and column  
174 content correlation [29] and no systematic contamination found. As there were few cases where a  
175 control had >20 reads for any nontarget MOTU, we adopted 20 reads as the cut-off for identifying  
176 MOTU presence.

177

178 Present MOTUs with a less than 90% match to their best hit were then discarded as inconclusively  
179 identified and remaining MOTUs amalgamated based on their genus identification, as species  
180 identification was seen to be very slight and not reliable at the *rbcl* locus. 185 plant genera were  
181 identified and compared with common artificial garden bird foods to extract relevant genera. All  
182 further analyses were carried out only on these identified artificial food taxa within focal samples  
183 (excluding duplicate and control samples, and those not confirmed to be from blue tit).

184

## 185 **Statistical analyses**

186

187 The first model examined how artificial food consumption varied with regards to environmental  
188 factors. A binary value of whether artificial food was present in a faecal sample or not was used as  
189 the response variable of a Bayesian generalised linear mixed model (GLMM) [41], with distance to  
190 nearest human habitation, date, elevation, latitude, year as a factor and number of faeces in sample  
191 (1-3 and U for unknown, factor) as fixed predictor variables. All numeric predictor variables were  
192 mean centred for ease of interpretation [42] and to facilitate model convergence. Distance to  
193 human habitation was analysed on the logarithmic scale due to right skewed data and from the  
194 perspective of a distance decay. Date was analysed as a deviation from the respective sample site



195 mean per year, as different sites and years have different blue tit breeding phenology. Site and  
196 nestbox were included as random effects and the model was run for ten million iterations, removing  
197 the first 100,000 as burn-in and thinning every 100. A binomial error structure was used along with  
198 parameter expanded priors for the variance terms with residual variance fixed at 0.5. Repeatability  
199 in the detection of artificial food consumption was analysed on 29 repeat samples (one was  
200 removed during quality control steps above) and their corresponding focal samples by calculating  
201 Jaccard similarity.

202

203 The second set of models aimed to infer whether artificial food consumption affected the breeding  
204 parameters and fitness of the birds and to do so the mean artificial food consumption at each site  
205 was calculated. Site mean consumption was used rather than nestbox level consumption for two  
206 reasons: i) blue tits often do not nest in a nestbox they are roosting in prior to breeding, but rather  
207 nearby, precluding direct attribution, ii) faeces were only produced in certain nestboxes so most  
208 nesting attempts are not in a nestbox from which faeces were collected. In addition, if we assume  
209 that the estimated mean artificial food consumption at a site is representative of the nests then  
210 framing the analysis at the site level benefits the sample size and power. Firstly, nestbox occupancy  
211 was treated as the response variable in a Bayesian GLMM [41] containing mean artificial food  
212 consumption (varying 0-1), elevation, latitude and year as a factor as fixed predictor variables, and  
213 site and nestbox as random effects, with all numeric predictor variables mean-centred. A binomial  
214 error structure was used with similar priors to the first model. Similar models were then run with  
215 first egg laying date, clutch size, productivity and adult blue tit mass as response variables with  
216 Gaussian error structures and no fixed residual variance. In addition to the standard fixed predictor  
217 variables mentioned above, the mass model also contained the age and sex of the bird.

218

219 To gain an indication of whether supplementary feeder usage and competition with blue tits may be  
220 affecting UK forest bird populations over time, the 25-year population trends of potential

221 competitor forest bird species were analysed. Species were included based on the following criteria:  
222 average body length less than twice a blue tit (<24cm), foraging substantially on foliage-gleaned  
223 invertebrates during the breeding season, occupying wooded habitats, and with a substantial  
224 enough UK population to have a 25-year BTO BirdTrends population trend estimate [43]. For each  
225 species, the population trend was coded based on five categories (1 = > -50%, 2 = -11 - -50%, 3 = -10  
226 - +10%, 4 = +11 - +50%, 5 = > +50%) [43], supplementary garden bird feeder usage was defined (1 =  
227 rare or never, 2 = frequent (>5% occurrence in 2020 RSPB Big Garden Birdwatch  
228 [www.rspb.org.uk/get-involved/activities/birdwatch/results/](http://www.rspb.org.uk/get-involved/activities/birdwatch/results/))), competition status versus blue tit  
229 categorised (1 = outcompeted (average lower mass and/or published evidence of outcompetition for  
230 food or breeding sites [43–45]), 2 = not outcompeted (all others), and competition type valued (1 =  
231 food, 2 = food and breeding site (if nesting in small cavities [46])); this yielded 21 species. A general  
232 linear model [47] was conducted containing coded population trend as the response variable, and  
233 feeder usage, competition status versus blue tit, and competition type as predictor variables. As the  
234 sample size was small for linear modelling, three Welch's Two-sample T-tests were also conducted  
235 to analyse independently how coded population trend varied with regards to i) supplementary  
236 feeder usage, ii) competition status, and iii) competition type.

237

## 238 **Results**

239

240 Out of 788 active faecal samples, 53% (n = 414) contained evidence of artificial food consumption.  
241 Five artificial foodstuffs were identified, with peanut (*Arachis*) by far the most common, present in  
242 49% of total samples. Sunflower (*Helianthus*) was also highly prevalent (17%), with maize (*Zea*) (9%),  
243 barley (*Hordeum*) (5%) and millet (*Panicum*) (1%) rarer. 63% of samples containing artificial food  
244 contained only one type, with 37% showing evidence of more than one artificial foodstuff, and two  
245 samples containing all five. The repeatability of finding evidence of either a peanut (Jaccard

246 similarity = 0.923) or artificial food in general (Jaccard similarity = 0.923) within a repeat sample was  
247 very high.

248

249 Increasing distance to nearest human habitation predicted a significant reduction in artificial food  
250 consumption (Table 1, Fig 1a). Different years also had significantly different artificial food  
251 consumption rates, such that in 2014 the model predicted a 93% chance of a faecal sample  
252 containing artificial foodstuffs at the closest site distances examined in our study (33m) reducing to  
253 29% at 200m, 6% at 500m, and 1% at our furthest site distances examined (1384m), while in 2015  
254 these figures were higher, with 97% chance at 33m, 51% chance at 200m, 15% chance at 500m, and  
255 2% chance at 1384m to nearest human habitation (Fig 1a). The faeces collected at the site 1384m to  
256 nearest human habitation did however show artificial food consumption in 75% of samples in 2015  
257 (Fig 1a).

258

259 Artificial food use also significantly declined through the sampling period, in the run-up to breeding  
260 (Table 1, Fig 1b). In 2014 the model predicted that there was a 65% chance of a faecal sample  
261 containing artificial food at our earliest sampling times (70 days before mean first egg laying),  
262 declining to 24% by 30 days to egg laying and 7% by egg laying (Fig 1b). For 2015 these figures were  
263 elevated to 83% at the earliest times, 44% in the mid time frame and 17% at egg laying (Fig 1b).  
264 Elevation and latitude showed no significant effect on artificial food consumption, and combining  
265 more faeces per sample increased the likelihood of artificial food detection (Table 1). Site and  
266 nestbox random effects explained similar amounts of variance (Table 1).

267

268 Increased artificial food consumption significantly predicted a large increase in nestbox occupation,  
269 from a 20% likelihood with no artificial food consumption to a 75% likelihood with artificial food  
270 present in every faecal sample (Table 2, Fig 2a). Artificial food consumption also significantly  
271 advanced egg laying date by five days (from day 122 to day 117, Table 2, Fig 2b). However, it did not

272 significantly affect clutch size, productivity or the mass of either male or female parent blue tits  
273 (Table 2).  
274  
275 From the t-tests, it was shown that population trends of competitor bird species were significantly  
276 more likely to be increasing for species using supplementary feeders and decreasing for species not  
277 using them ( $t = -2.3$ ,  $df = 18.0$ ,  $p = 0.03$ , Fig 3). Additionally, population trends for species  
278 outcompeted by blue tits were significantly more likely to be decreasing and those not outcompeted  
279 by blue tits increasing ( $t = -2.4$ ,  $df = 17.8$ ,  $p = 0.03$ , Fig 3). While competition type did not significantly  
280 predict population trends ( $t = 0.9$ ,  $df = 17.7$ ,  $p = 0.4$ ), a non-significant trend of those species  
281 competing with blue tits for both food and nesting sites declining more than those only competing  
282 for food was observed (Fig 3). The linear model analysing population trends showed no significant  
283 effects, but trends were strong and in the direction indicated by the t-tests (Table 3), with a species  
284 that didn't use feeders, is outcompeted by blue tits, and competes for both food and nesting sites  
285 with blue tits far more likely to be declining than a converse species (Fig 3, Table 3).

286

## 287 Discussion

288

289 Supplementary foodstuffs were shown by faecal metabarcoding to be present in the majority (53%)  
290 of blue tit faecal samples immediately prior to breeding, with peanuts identified in more faecal  
291 samples (49%) than any other single dietary item, natural or artificial, with the most frequent natural  
292 prey item, *Argyresthia goedartella*, present in 34% of the same samples for comparison [29]. As the  
293 study area incorporates some of the more remote parts of the UK and we show blue tits travelling  
294 almost 1.4km to use supplementary bird feeders during a time of year when movement is thought to  
295 be restricted around breeding territories [39], this study reveals just how prevalent and ubiquitous  
296 supplementary food is in the diet of a wild bird species in a country with high provisioning rates  
297 [2,4,32]. Indeed, these results reveal it likely that supplementary food is available to almost every

298 blue tit (and other feeder-using bird species, as blue tits are relatively sedentary and short-winged  
299 [39]) in the UK, with implications likely to extrapolate across large parts of the western world due to  
300 similarly high supplementary feeding rates [11,12]. We infer from this that any impacts from  
301 supplementary feeding will therefore be felt far wider than solely in urban environments as has  
302 hitherto been assumed [1,33]. As we find that supplementary food usage is strongly associated with  
303 a dramatic increase in nestbox occupation (a proxy of breeding density) and an advance in lay date,  
304 it is perhaps unsurprising then that we find the national population trends of supplementary feeder-  
305 using woodland bird species are increasing on average while the populations of competitor species  
306 not benefitting from supplementary feeders are decreasing.

307

308 As predicted, supplementary food use declined with increasing distance to nearest human  
309 habitation. While this relationship has previously been assumed [18,19], we believe this  
310 quantification to be the first in a natural situation, made possible by faecal metabarcoding, with  
311 inferences about diet composition proving highly repeatable. The usage rate was still considerable at  
312 several hundred metres, however, beyond the cut-off distance used between treatments and/or  
313 nearby human habitation in previous supplementary feeding experiments [19], which may  
314 contribute a background or even confounding effect in many contexts. The distance travelled to  
315 supplementary food, and overall usage rates, differed markedly between the two years in our study,  
316 with 2015 having higher values than 2014. We believe this to be due to 2015 being considerably  
317 colder across our study region, as natural food levels are lower in these conditions [29,48], and  
318 benefits from supplementary feeding larger due to natural nutrient limitation, concurring with  
319 previous studies [15]. In addition to a distance decay, supplementary food usage also declined over a  
320 temporal gradient throughout our study period. This is presumably due to large increases in natural  
321 invertebrate prey as spring progresses [29,49] alongside individuals being more restricted to  
322 breeding territories as nesting commences [39]. There was no impact of the geographic gradients of

323 latitude and elevation, which vary substantially over the study region, indicating a widespread  
324 similarity in uptake.  
325  
326 Previous research has developed a mixed picture of the benefits and costs of supplementary feeding  
327 conferred on the species using these extra resources, including blue tits. Using faecal metabarcoding  
328 to identify definite rather than assumed supplementary food intake across a real-world gradient  
329 without the need for additional experimentation has allowed us to demonstrate major fitness  
330 benefits conferred upon blue tits at sites with higher supplementary food uptake. Supplementary  
331 food use predicted an almost four-fold increase in nestbox occupation, an accurate proxy for  
332 breeding density in our system due to sites having equal numbers of equally spaced nestboxes [36],  
333 between lowest and highest values. We expect increasing breeding densities to extrapolate to other  
334 feeder-using species as feeder presence increases local abundances of feeder-using species [34],  
335 providing an explanation for bird breeding densities varying with human household densities [50].  
336 The five-day advancement in egg laying we identify is very similar to that found in previous studies  
337 [15,19] and may comprise the limit of the plastic response of phenology to the lifting of an energetic  
338 constraint, with earlier laying associated with higher productivity [51]. Perhaps this is why individual  
339 nest productivity didn't decline due to density effects as might be imagined [52], but instead showed  
340 a minor increase. Clutch size not being significantly predicted by supplementary feeding agrees with  
341 previous studies [19] and reinforces that environmental aspects seem to have little effect on clutch  
342 size [36].  
343  
344 Many species utilising supplementary feeding, such as blue tits, are common, adaptable and already  
345 at population carrying capacity [38,53]. Boosting the productivity, survival, fitness and breeding  
346 densities of such species without any increase in available habitat or natural resources is likely to  
347 negatively effect their competitors, particularly those not utilising the new artificial resources [38].  
348 This may be particularly evident in forest species, as rather than replace natural resources that have

349 been lost due to landscape intensification as might be the case for farmland species [54],  
350 supplementary feeding is solely providing additional artificial resources to certain species. To this  
351 end, we demonstrate that populations of UK forest bird species that don't use supplementary  
352 feeders are likely to be declining whereas those that do are likely to be increasing over the last 25  
353 years. Artificial feeding is therefore likely a driver of population change, in line with recent evidence  
354 [33]. Species that are dominated in competition by blue tits are also likely to be declining whereas  
355 those that are dominant over blue tits are likely to be increasing, while competing with blue tits for  
356 limited breeding sites in addition to food resources appears to non-significantly increase the risk of  
357 population decline.

358

359 While we do not analyse a causal link between supplementary feeding and the declines of these  
360 competitor species due to the increased competitiveness of feeder-using species, the mechanisms  
361 whereby increased blue tit densities could impact other species are clear. For example, blue (and  
362 great) tits are known to frequently evict species such as willow tit and lesser spotted woodpecker  
363 from nest holes that they have excavated [44,55], kill pied flycatchers when claiming nesting sites  
364 [45], and dominate subordinate marsh and willow tits at food resources [39]. Abundant and  
365 permanent feeding might also eliminate any competitive advantage other species (such as marsh  
366 tits) exhibit in finding and exploiting natural resources first [56], before being outcompeted by  
367 dominant species like blue tits, or migrating to warmer climes for winter to avoid winter starvation,  
368 as for pied flycatchers [57]. Supplementary feeding therefore, although well-intentioned and  
369 beneficial to the species partaking, may be shifting the competitive balance of natural ecosystems  
370 and the structures enabling community coexistence, favouring certain species at the expense of  
371 others, and contributing to human-mediated ecological homogenisation [37,38].

372

373 In conclusion, we reveal through faecal metabarcoding the pervasiveness of supplementary  
374 foodstuffs in the diet of a wild bird and the large benefits conferred on breeding density and

375 phenology from using these substantial additional resources. We also show that the distances  
376 travelled to utilise these resources are further than previously imagined, even in a largely sedentary  
377 species at a time of year when movement is thought to be restricted. This indicates that the effects  
378 of supplementary feeding on ecosystems are likely to extend far beyond just urban environments as  
379 has hitherto been assumed. Finally, we demonstrate that species making use of supplementary  
380 resources are likely to be increasing in population while those that do not are likely decreasing,  
381 possibly due to shifting competition balances and ecosystem dynamics. As supplementary  
382 provisioning of wildlife (both intentional and incidental) is hugely prevalent and increasing [2], it may  
383 have large and widespread ramifications for biodiversity conservation, and we urge caution upon  
384 policy makers advocating supplementary feeding for wildlife engagement.

385

### 386 **Acknowledgements**

387

388 We wish to thank Ally Phillimore for manuscript comments and providing laboratory funding, Jarrod  
389 Hadfield for additional laboratory funding, Irene Benedicto Cabello and Ed Ivimey-Cook for  
390 assistance with fieldwork, and all the landowners and managers who allowed us access to their land.  
391 This work was funded by a NERC PhD studentship to JDS.

392

### 393 **Authors' Contributions**

394

395 JDS conceived and managed the study, conducted the fieldwork, contributed to data curation,  
396 analysed the data and wrote the manuscript. UHT contributed to data curation. JAN devised and  
397 conducted all laboratory protocols. All authors contributed to later manuscript editing.

398

### 399 **Data Availability Statement**

400



401 Data will be made publicly available via the Dryad digital repository upon acceptance.

402

403 **References**

404

- 405 1. Jones DN, Reynolds SJ. 2008 Feeding Birds in Our Towns and Cities : A Global Research  
406 Opportunity. *J. Avian Biol.* **39**, 265–271. (doi:10.1111/j.2008.0908-8857.04271.x)
- 407 2. Cox DTC, Gaston KJ. 2018 Human–nature interactions and the consequences and drivers of  
408 provisioning wildlife. *Philos. Trans. R. Soc. B Biol. Sci.* **373**, 20170092.  
409 (doi:10.1098/rstb.2017.0092)
- 410 3. Hanmer HJ, Thomas RL, Fellowes MDE. 2017 Provision of supplementary food for wild birds  
411 may increase the risk of local nest predation. *Ibis (Lond. 1859)*. **159**, 158–167.  
412 (doi:10.1111/ibi.12432)
- 413 4. Davies ZG, Fuller RA, Dallimer M, Loram A, Gaston KJ. 2012 Household factors influencing  
414 participation in bird feeding activity: A national scale analysis. *PLoS One* **7**.  
415 (doi:10.1371/journal.pone.0039692)
- 416 5. Davies ZG, Fuller RA, Loram A, Irvine KN, Sims V, Gaston KJ. 2009 A national scale inventory of  
417 resource provision for biodiversity within domestic gardens. *Biol. Conserv.* **142**, 761–771.  
418 (doi:10.1016/j.biocon.2008.12.016)
- 419 6. PFMA. 2018 PFMA’s pet data report 2018.
- 420 7. Robb GN, McDonald RA, Chamberlain DE, Bearhop S. 2008 Food for thought: supplementary  
421 feeding as a driver of ecological change in avian populations. *Front. Ecol. Environ.* **6**, 476–484.  
422 (doi:10.1890/060152)
- 423 8. Orros ME, Fellowes MDE. 2015 Wild Bird Feeding in an Urban Area: Intensity, Economics and  
424 Numbers of Individuals Supported. *Acta Ornithol.* **50**, 43–58.  
425 (doi:10.3161/00016454ao2015.50.1.006)
- 426 9. Hanmer HJ, Thomas RL, Fellowes MDE. 2018 Introduced Grey Squirrels subvert  
427 supplementary feeding of suburban wild birds. *Landsc. Urban Plan.* **177**, 10–18.  
428 (doi:10.1016/j.landurbplan.2018.04.004)
- 429 10. Reed JH, Bonter DN. 2018 Supplementing non-target taxa: bird feeding alters the local  
430 distribution of mammals. *Ecol. Appl.* **28**, 761–770. (doi:10.1002/eap.1683)
- 431 11. Baverstock S, Weston MA, Miller KK. 2019 A global paucity of wild bird feeding policy. *Sci.*  
432 *Total Environ.* **653**, 105–111. (doi:10.1016/j.scitotenv.2018.10.338)
- 433 12. Jones DN. 2011 An appetite for connection: Why we need to understand the effect and value  
434 of feeding wild birds. *Emu* **111**. (doi:10.1071/MUv111n2\_ED)
- 435 13. Robb GN, McDonald RA, Inger R, Reynolds SJ, Newton J, McGill RAR, Chamberlain DE,  
436 Harrison TJE, Bearhop S. 2011 Using stable-isotope analysis as a technique for determining  
437 consumption of supplementary foods by individual birds. *Condor* **113**, 475–482.  
438 (doi:10.1525/cond.2011.090111)
- 439 14. Orros ME, Thomas RL, Holloway GJ, Fellowes MDE. 2015 Supplementary feeding of wild birds  
440 indirectly affects ground beetle populations in suburban gardens. *Urban Ecosyst.* **18**, 465–  
441 475. (doi:10.1007/s11252-014-0404-x)
- 442 15. Nager RG, Ruegger C, van Noordwijk AJ. 1997 Nutrient or energy limitation on egg formation:  
443 A feeding experiment in great tits. *J. Anim. Ecol.* **66**, 495–507.
- 444 16. Robb GN, McDonald RA, Chamberlain DE, Reynolds SJ, Harrison TJEE, Bearhop S. 2008 Winter  
445 feeding of birds increases productivity in the subsequent breeding season. *Biol. Lett.* **4**, 220–  
446 223. (doi:10.1098/rsbl.2007.0622)
- 447 17. Peach WJ, Sheehan DK, Kirby WB. 2014 Supplementary feeding of mealworms enhances  
448 reproductive success in garden nesting House Sparrows *Passer domesticus*. *Bird Study* **61**,  
449 378–385. (doi:10.1080/00063657.2014.918577)
- 450 18. Plummer KE, Bearhop S, Leech DI, Chamberlain DE, Blount JD. 2013 Winter food provisioning

- 451 reduces future breeding performance in a wild bird. *Sci. Rep.* **3**. (doi:10.1038/srep02002)
- 452 19. Harrison TJE, Smith J a, Martin GR, Chamberlain DE, Bearhop S, Robb GN, Reynolds SJ. 2010
- 453 Does food supplementation really enhance productivity of breeding birds? *Oecologia* **164**,
- 454 311–20. (doi:10.1007/s00442-010-1645-x)
- 455 20. Knutie SA. 2020 Food supplementation affects gut microbiota and immunological resistance
- 456 to parasites in a wild bird species. *J. Appl. Ecol.* **57**, 536–547. (doi:10.1111/1365-2664.13567)
- 457 21. Plummer KE, Bearhop S, Leech DI, Chamberlain DE, Blount JD. 2013 Fat provisioning in winter
- 458 impairs egg production during the following spring: a landscape-scale study of blue tits. *J.*
- 459 *Anim. Ecol.* **82**, 673–82. (doi:10.1111/1365-2656.12025)
- 460 22. Lawson B, Robinson RA, Toms MP, Risely K, Macdonald S, Cunningham AA. 2018 Health
- 461 hazards to wild birds and risk factors associated with anthropogenic food provisioning. *Philos.*
- 462 *Trans. R. Soc. B Biol. Sci.* **373**. (doi:10.1098/rstb.2017.0091)
- 463 23. Moyers SC, Adelman JS, Farine DR, Thomason CA, Hawley DM. 2018 Feeder density enhances
- 464 house finch disease transmission in experimental epidemics. *Philos. Trans. R. Soc. B Biol. Sci.*
- 465 **373**. (doi:10.1098/rstb.2017.0090)
- 466 24. Greig EI, Wood EM, Bonter DN. 2017 Winter range expansion of a hummingbird is associated
- 467 with urbanization and supplementary feeding. *Proc. R. Soc. B Biol. Sci.* **284**, 20170256.
- 468 (doi:10.1098/rspb.2017.0256)
- 469 25. Plummer KE, Siriwardena GM, Conway GJ, Risely K, Toms MP. 2015 Is supplementary feeding
- 470 in gardens a driver of evolutionary change in a migratory bird species? *Glob. Chang. Biol.* **21**,
- 471 4353–4363. (doi:10.1111/gcb.13070)
- 472 26. Ishigame G, Baxter GS, Lisle AT. 2006 Effects of artificial foods on the blood chemistry of the
- 473 Australian magpie. *Austral Ecol.* **31**, 199–207. (doi:10.1111/j.1442-9993.2006.01580.x)
- 474 27. Bosse M *et al.* 2017 Recent natural selection causes adaptive evolution of an avian polygenic
- 475 trait. *Science (80- )*. **358**, 365–368. (doi:10.1126/science.aal3298)
- 476 28. Pompanon F, Deagle BE, Symondson WOC, Brown DS, Jarman SN, Taberlet P. 2012 Who is
- 477 eating what: diet assessment using next generation sequencing. *Mol. Ecol.* **21**, 1931–1950.
- 478 (doi:10.1111/j.1365-294X.2011.05403.x)
- 479 29. Shutt JD, Nicholls JA, Trivedi UH, Burgess MD, Stone GN, Hadfield JD, Phillimore AB. 2020
- 480 Gradients in richness and turnover of a forest passerine’s diet prior to breeding: A mixed
- 481 model approach applied to faecal metabarcoding data. *Mol. Ecol.* , 1199–1213.
- 482 (doi:10.1111/mec.15394)
- 483 30. Krüger F, Clare EL, Symondson WOC, Keišs O, Petersons G. 2014 Diet of the insectivorous bat
- 484 *Pipistrellus nathusii* during autumn migration and summer residence. *Mol. Ecol.* **23**, 3672–
- 485 3683. (doi:10.1111/mec.12547)
- 486 31. Groom C, White NE, Mitchell N, Roberts JD, Mawson P. 2017 Assessing the spatial ecology
- 487 and resource use of a mobile and endangered species in an urbanized landscape using
- 488 satellite telemetry and DNA faecal metabarcoding. *Ibis (Lond. 1859)*. **159**, 390–405.
- 489 (doi:10.1111/ibi.12442)
- 490 32. Milligan ND, Radersma R, Cole EF, Sheldon BC. 2017 To graze or gorge: consistency and
- 491 flexibility of individual foraging tactics in tits. *J. Anim. Ecol.* **86**, 826–836. (doi:10.1111/1365-
- 492 2656.12651)
- 493 33. Plummer KE, Risely K, Toms MP, Siriwardena GM. 2019 The composition of British bird
- 494 communities is associated with long-term garden bird feeding. *Nat. Commun.* **10**, 2088.
- 495 (doi:10.1038/s41467-019-10111-5)
- 496 34. Fuller RA, Warren PH, Armsworth PR, Barbosa O, Gaston KJ. 2008 Garden bird feeding
- 497 predicts the structure of urban avian assemblages. *Divers. Distrib.* **14**, 131–137.
- 498 (doi:10.1111/j.1472-4642.2007.00439.x)
- 499 35. Galbraith JA, Beggs JR, Jones DN, Stanley MC. 2015 Supplementary feeding restructures
- 500 urban bird communities. *Proc. Natl. Acad. Sci. U. S. A.* **112**, E2648–E2657.
- 501 (doi:10.1073/pnas.1501489112)

- 502 36. Shutt JD, Bolton M, Cabello IB, Burgess MD, Phillimore AB. 2018 The effects of woodland  
503 habitat and biogeography on blue tit *Cyanistes caeruleus* territory occupancy and  
504 productivity along a 220 km transect. *Ecography (Cop.)*. **41**, 1967–1978.  
505 (doi:10.1111/ecog.03573)
- 506 37. Newbold T *et al.* 2019 Climate and land-use change homogenise terrestrial biodiversity, with  
507 consequences for ecosystem functioning and human well-being. *Emerg. Top. Life Sci.*  
508 (doi:10.1042/etls20180135)
- 509 38. Oro D, Genovart M, Tavecchia G, Fowler MS, Martínez-Abraín A. 2013 Ecological and  
510 evolutionary implications of food subsidies from humans. *Ecol. Lett.* **16**, 1501–1514.  
511 (doi:10.1111/ele.12187)
- 512 39. Perrins CM. 1979 *British Tits*.
- 513 40. Nychka D, Furrer R, Paige J, Sain S. 2017 fields: Tools for spatial data.  
514 (doi:10.5065/D6W957CT)
- 515 41. Hadfield JD. 2010 MCMC methods for multi-response generalized linear mixed models: The  
516 MCMCglmm R package. *J. Stat. Softw.* **33**, 1–22. (doi:10.1002/ana.22635)
- 517 42. Schielzeth H. 2010 Simple means to improve the interpretability of regression coefficients.  
518 *Methods Ecol. Evol.* **1**, 103–113. (doi:10.1111/j.2041-210X.2010.00012.x)
- 519 43. Massimino D *et al.* 2019 BirdTrends 2019: trends in numbers, breeding success and survival  
520 for UK breeding birds.
- 521 44. Smith KW, Smith L. 2020 Long-term trends in the nest survival and productivity of the Lesser  
522 Spotted Woodpecker *Dryobates minor* in Britain. *Bird Study* **67**, 109–118.  
523 (doi:10.1080/00063657.2020.1780195)
- 524 45. Samplonius JM, Both C. 2019 Climate Change May Affect Fatal Competition between Two  
525 Bird Species. *Curr. Biol.* **29**, 327–331.e2. (doi:10.1016/j.cub.2018.11.063)
- 526 46. Holden P, Cleeves T. 2010 *RSPB Handbook of British Birds*. 3rd edn. London: Christopher  
527 Helm.
- 528 47. Bates D, Maechler M, Bolker BM, Walker S. 2015 lme4: Linear mixed-effects models using  
529 Eigen and S4. *J. Stat. Softw.* **67**, 1–48. (doi:http://lme4.r-forge.r-project.org/)
- 530 48. Southwood TRE, Wint GRW, Kennedy CEJ, Greenwood SR. 2004 Seasonality, abundance,  
531 species richness and specificity of the phytophagous guild of insects on oak (*Quercus*)  
532 canopies. *Eur. J. Entomol.* **101**, 43–50. (doi:10.14411/eje.2004.011)
- 533 49. Shutt JD, Burgess MD, Phillimore AB. 2019 A spatial perspective on the phenological  
534 distribution of the spring woodland caterpillar peak. *Am. Nat.* **194**, E109–E121.  
535 (doi:10.1086/705241)
- 536 50. Tratalos J, Fuller RA, Evans KL, Davies RG, Newson SE, Greenwood JJD, Gaston KJ. 2007 Bird  
537 densities are associated with household densities. *Glob. Chang. Biol.* **13**, 1685–1695.  
538 (doi:10.1111/j.1365-2486.2007.01390.x)
- 539 51. Visser ME, van Noordwijk AJ, Tinbergen JM, Lessells CM. 1998 Warmer springs lead to  
540 mistimed reproduction in great tits (*Parus major*). *Proc. R. Soc. B Biol. Sci.* **265**, 1867–1870.  
541 (doi:10.1098/rspb.1998.0514)
- 542 52. Dhondt AA, Kempenaers B, Adriaensen F. 1992 Density-Dependent Clutch Size Caused by  
543 Habitat Heterogeneity. *J. Anim. Ecol.* **61**, 643–648.
- 544 53. Galbraith JA, Jones DN, Beggs JR, Parry K, Stanley MC. 2017 Urban bird feeders dominated by  
545 a few species and individuals. *Front. Ecol. Evol.* **5**. (doi:10.3389/fevo.2017.00081)
- 546 54. Pierret P, Jiguet F. 2018 The potential virtue of garden bird feeders: More birds in citizen  
547 backyards close to intensive agricultural landscapes. *Biol. Conserv.* **222**, 14–20.  
548 (doi:10.1016/j.biocon.2018.03.033)
- 549 55. Parry W, Broughton RK. 2018 Nesting behaviour and breeding success of Willow Tits *Poecile*  
550 *montanus* in north-west England. *Ringing Migr.* **33**, 75–85.  
551 (doi:10.1080/03078698.2018.1631610)
- 552 56. Farine DR, Aplin LM, Sheldon BC, Hoppitt W. 2015 Interspecific social networks promote

- 553 information transmission in wild songbirds. *Proc. R. Soc. B Biol. Sci.* **282**.  
554 (doi:10.1098/rspb.2014.2804)  
555 57. Lundberg A, Alatalo R. 2010 *The Pied Flycatcher*. A & C Black.  
556

557 **Figures and Tables**

558

559 **Table 1** The effects of multiple predictors on whether artificial food has been consumed. Results are  
560 taken from a Bayesian GLMM with categorical error structure and logit link function, showing slope  
561 estimates and credible intervals for each fixed and random term, with significance asterisks for  
562 significant and near-significant terms ( $p_{\text{MCMC}} \leq 0.1$  °  $\leq 0.05$ \*  $\leq 0.01$ \*\*  $\leq 0.001$ \*\*\*). Numeric predictor  
563 variables are mean centred, distance to habitation is also logged, and date has been adjusted for  
564 phenology by representing days before mean first egg laying at a given site within a given year. The  
565 intercept year value is 2014 and number of faeces is one.

566

| <b>Fixed Effects</b>   | <b>Coefficient (C.I.'s)</b> |
|------------------------|-----------------------------|
| Intercept              | -1.12 (-2.64 – 0.44)        |
| Distance to habitation | -1.97 (-3.10 – -0.80) ***   |
| Days before laying     | 0.04 (0.02 – 0.07) ***      |
| Elevation              | 0.0005 (-0.0096 – 0.0104)   |
| Latitude               | -0.81 (-2.73 – 1.08)        |
| Year 2015              | 0.95 (-0.12 – 2.03) °       |
| Faeces = 2             | -0.07 (-1.21 – 1.07)        |
| Faeces = 3             | 1.37 (0.42 – 2.36) **       |
| Faeces = unknown       | 2.25 (0.88 – 3.67) ***      |
| <b>Random Effects</b>  |                             |
| Site                   | 5.85 (1.40 – 11.44)         |
| Nestbox                | 5.01 (2.27 – 8.24)          |

567

568

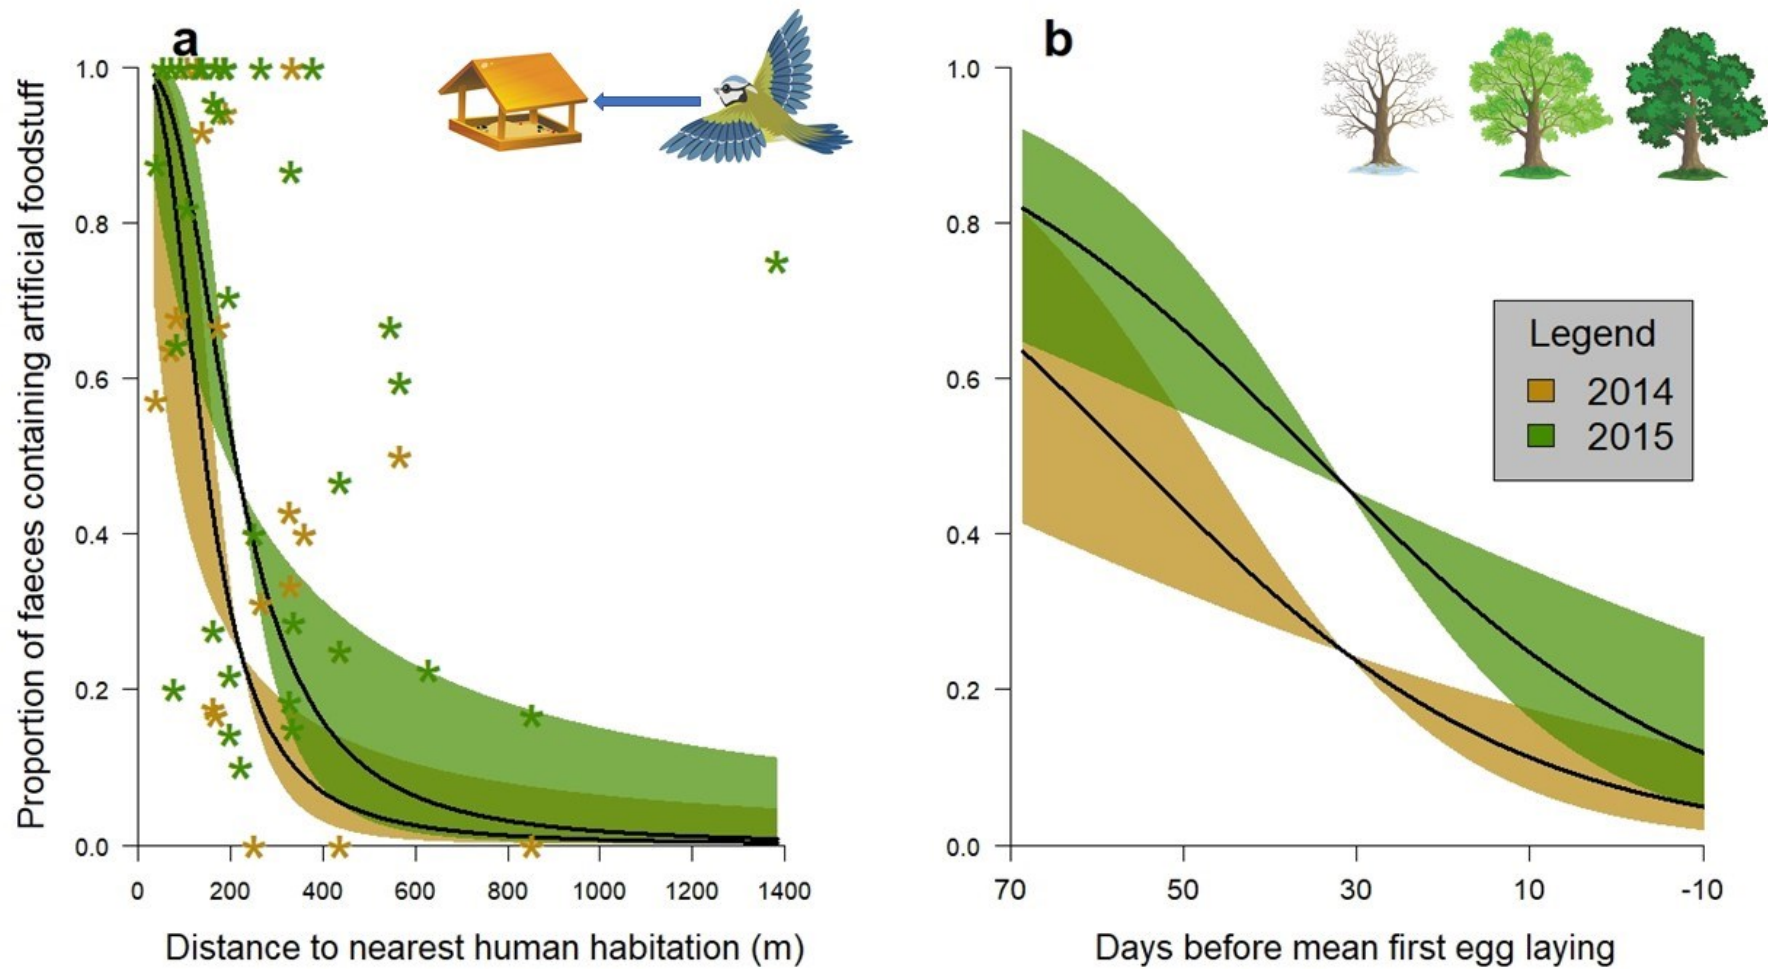

**Figure 1:** Illustrating the significant effects of a) distance to nearest human habitation and b) sampling date (adjusted for the phenology of the site within year by days before mean first egg laying within site and year) on the probability of artificial food consumption by blue tits, described in Table 1. The predicted response of each is shown in 2014 (gold) and 2015 (green), additionally showing the near-significant effect of year from the model (Table 1). Asterisks in a) show the proportion of faeces containing artificial foodstuff per site per year, not the 0/1 response analysed in the model.

**Table 2** The effects of artificial food intake and other predictor variables on a range of blue tit breeding parameters. Results are taken from Bayesian GLMM's, showing slope estimates and credible intervals for each fixed and random term, with significance asterisks for significant terms (pMCMC  $\leq 0.05^*$   $\leq 0.01^{**}$   $\leq 0.001^{***}$ ). Occupancy is presented on a binomial scale with the other response variables gaussian. Numeric predictor variables are mean centred, and the intercept year is 2014, with intercept values of first year adult and female for the mass model. Artificial food intake was calculated as a per site per year proportion of faeces containing artificial food and applied to all nests at that site in that year.

|                                    | <b>Occupancy</b>            | <b>Egg Laying</b>           | <b>Clutch Size</b>          | <b>Productivity</b>         | <b>Mass</b>                                |
|------------------------------------|-----------------------------|-----------------------------|-----------------------------|-----------------------------|--------------------------------------------|
| <b>Fixed Effects</b>               | <b>Coefficient (C.I.'s)</b> | <b>Coefficient (C.I.'s)</b> | <b>Coefficient (C.I.'s)</b> | <b>Coefficient (C.I.'s)</b> | <b>Coefficient (C.I.'s)</b>                |
| Intercept                          | 0.06 (-0.44 – 0.60)         | 119.33 (117.57 – 121.06)    | 8.70 (8.28 – 9.12)          | 6.96 (6.25 – 7.63)          | 10.71 (10.57 – 10.84)                      |
| Artificial Food                    | 2.47 (1.14 – 3.70) ***      | -4.39 (-8.50 – -0.17) *     | -0.15 (-0.96 – 0.62)        | 0.87 (-0.47 – 2.11)         | 0.07 (-0.12 – 0.25)                        |
| Elevation                          | -0.01 (-0.01 – -0.01) ***   | 0.02 (0.01 – 0.03) **       | 0.001 (-0.002 – 0.004)      | 0.002 (-0.003 – 0.006)      | -0.0006 (-0.0012 – 0.0002)                 |
| Latitude                           | -1.30 (-2.11 – -0.61) ***   | 0.79 (-1.82 – 3.20)         | -0.55 (-0.99 – -0.09) *     | -0.77 (-1.52 – -0.07) *     | -0.13 (-0.25 – -0.03) *                    |
| Year 2015                          | 1.20 (0.61 – 1.74) ***      | 4.41 (2.89 – 6.11) ***      | -1.13 (-1.59 – -0.66) ***   | -3.41 (-4.17 – -2.61) ***   | 0.003 (-0.14 – 0.12)                       |
| Year 2016                          | 0.60 (0.08 – 1.18) *        | 8.19 (6.64 – 9.75) ***      | -0.64 (-1.14 – -0.18) **    | -1.54 (-2.34 – 0.74) ***    | -0.13 (-0.27 – -0.002)                     |
| 2 <sup>nd</sup> Year +<br>Sex Male |                             |                             |                             |                             | 0.06 (-0.04 – 0.16)<br>0.05 (-0.04 – 0.14) |
| <b>Random Effects</b>              |                             |                             |                             |                             |                                            |
| Site                               | 0.71 (0 – 1.57)             | 12.41 (4.29 – 22.54)        | 0.24 (0 – 0.58)             | 0.60 (0 – 1.42)             | 0.008 (0 – 0.023)                          |
| Nestbox                            | 0.74 (0 – 1.69)             | 2.76 (0 – 7.16)             | 0.15 (0 – 0.47)             | 0.15 (0 – 0.58)             | 0.003 (0 – 0.052)                          |
| Residual                           | 0.5                         | 30.98 (25.00 – 37.09)       | 2.90 (2.41 – 3.42)          | 8.19 (6.93 – 9.52)          | 0.23 (0.20 – 0.27)                         |



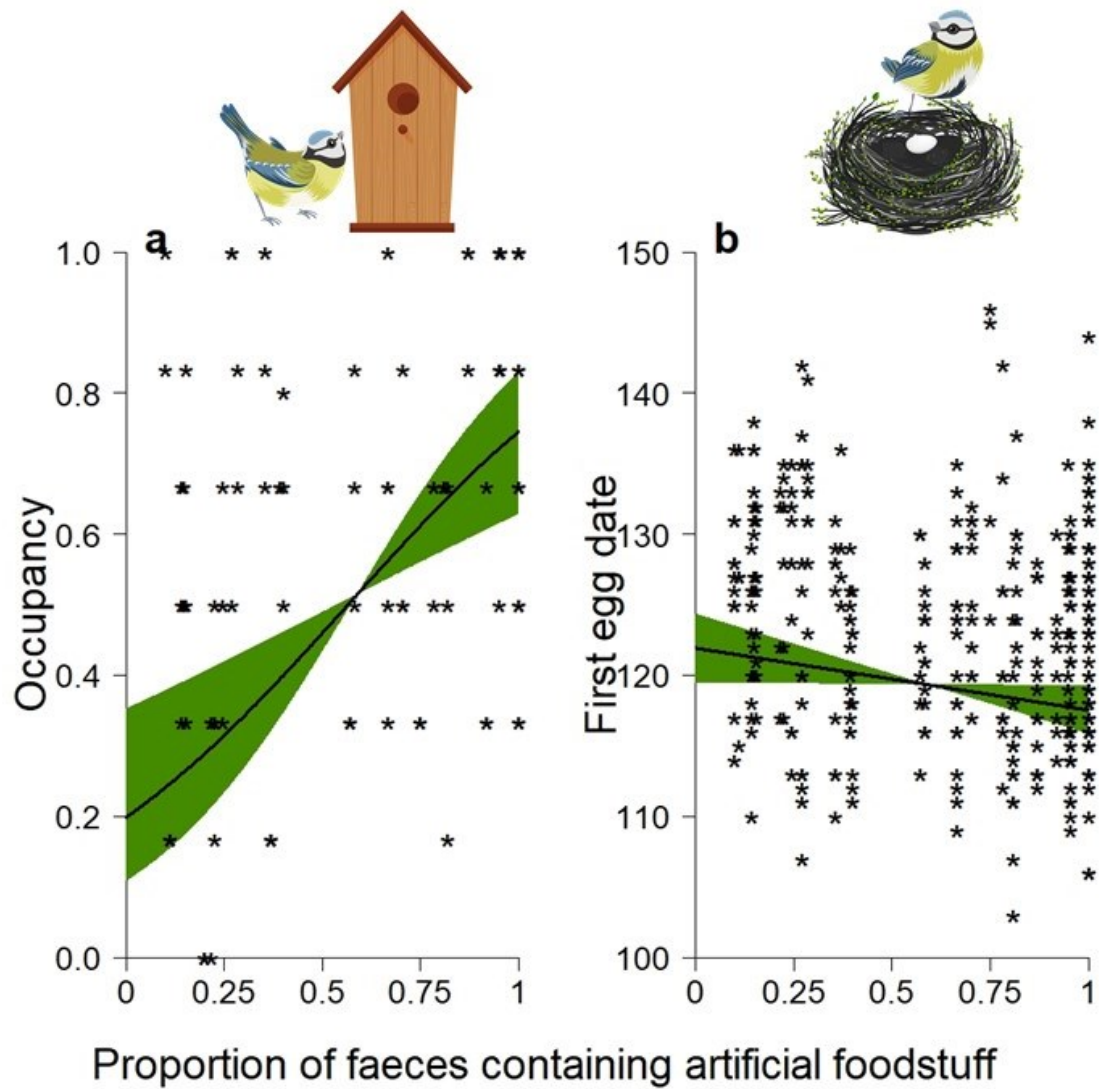

**Figure 2** Illustrating the significant effects of site-level artificial food intake on a) nestbox occupancy probability and b) first egg laying date, taken from results shown in Table 2. Asterisks in a) depict site per year occupancy rates rather than the 0/1 occupied response analysed in the model. Predictions correspond to 2014.



**Table 3** How 25-year population trend varies with use of garden feeders, competition status with blue tits, and whether only food or both food and nest sites are competed for. No terms are significant, the intercept value shows a species that doesn't use feeders, is outcompeted by blue tit and competes only for food.

| <b>Fixed Effects</b>        | <b>Estimate ± SE</b> |
|-----------------------------|----------------------|
| Intercept                   | 2.49 ± 0.50          |
| Feeder use                  | 1.30 ± 0.75          |
| Not outcompeted by blue tit | 0.65 ± 0.70          |
| Nestbox competition         | -0.69 ± 0.66         |

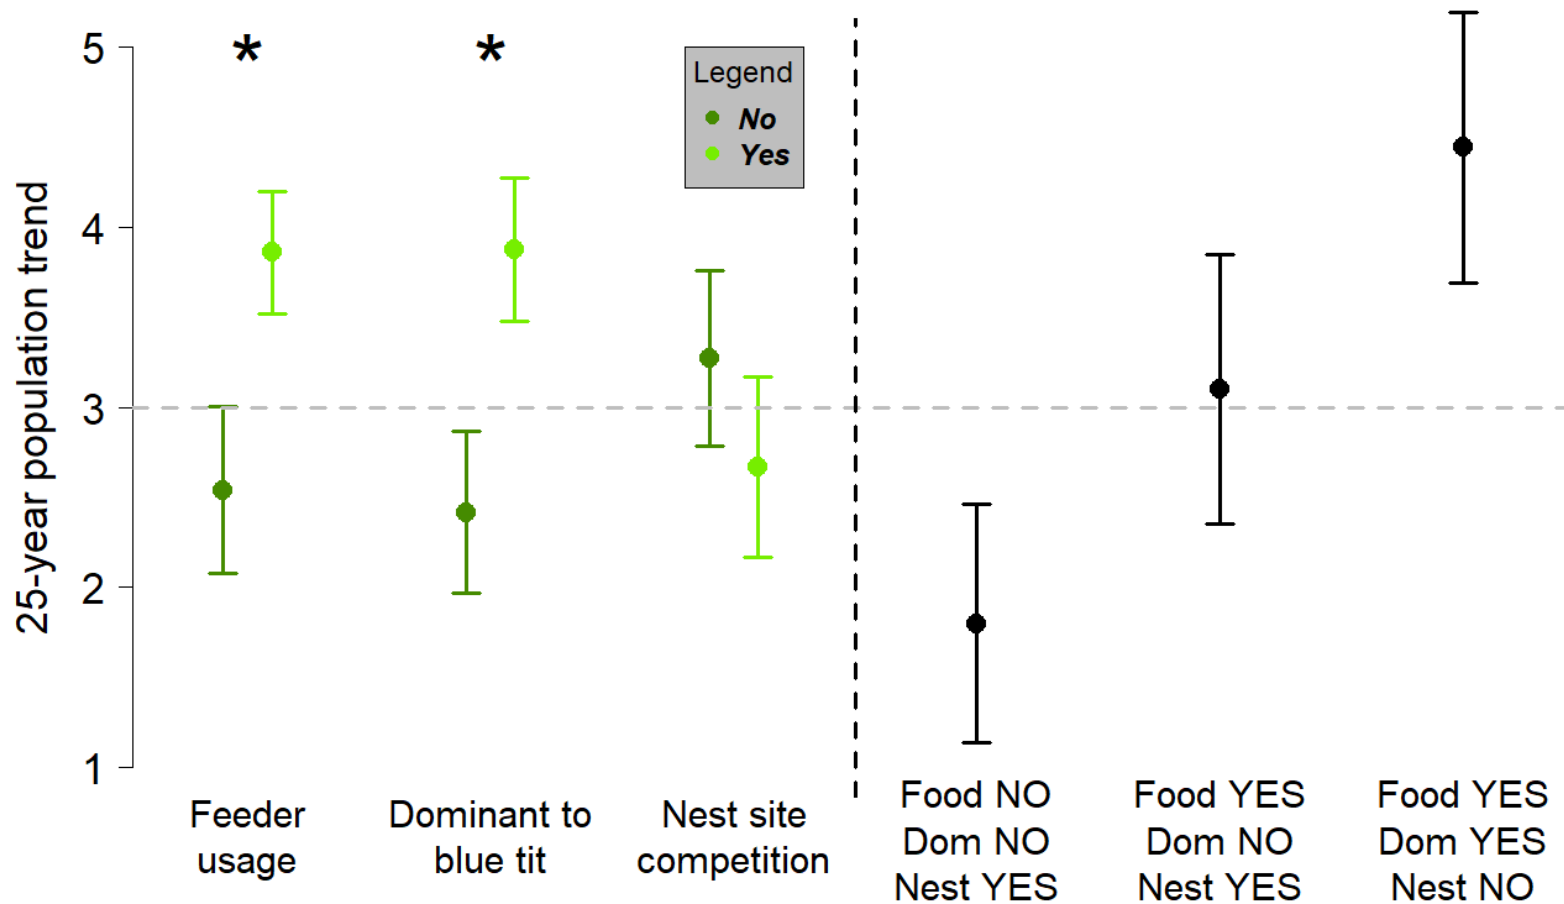

**Figure 3** Differing population trends of twenty insectivorous woodland bird species in the UK with regards to i) supplementary garden feeder usage ii) behavioural dominance in comparison to blue tits and iii) whether the species competes for nest sites with blue tits, with values depicting mean  $\pm$  standard error with significance asterisks above significant differences as determined by a t-test, all presented to the left of the horizontal dashed line. To the right of the horizontal dashed line are linear model estimates  $\pm$  standard error depicting hypothetical species that vary in whether they use supplementary food, are dominant to blue tit and compete for nest sites with blue tit. A trend value of 1 represents a large population decline ( $> -50\%$ ) and 5 a large population increase ( $>50\%$ ) over 25 years, with a stable population (trend value = 3) shown by a grey dashed line.
